# Supplementary material
Source: PubMed Central journal article supplement (PMC1955732)
Supplement: plntcell_tpc.107.051813_1.pdf [file plntcell_tpc.107.051813_1.pdf]

```

AI LHS1      ----- IENK I SRQVTF AKRRNGL LKKAYEL SLLCDAEVAL I IFS-
Ec LHS1      ----- LENK I SRQVTF AKRRNGL LKKAYEL SLLCDAEVAL I IFS-
Ds LHS1      ----- IENK I SRQVTF AKRRNGL LKKAYEL SLLCDAEVAL I IFS-
Cl LHS1      ----- IENK I SRQVTF AKRRNGL LKKAYEL SLLCDAEVAL I IFS-
ZMM14       ----- FAKRRNGL LKKAYEL SLLCDAEVAL I IFS-
ZMM8        ----- K I SRQVTF AKRRNGL LKKAYEL SLLCDAEVAL I IFS-
Sb LHS1      ----- IENK I SRQVTF AKRRNGL LKKAYEL SLMCDAEVAL I IFS-
Si LHS1      ----- IENK I SRQVTF AERRNGL LKKAYEL SLLCDAEVAL I IFS-
Pg LHS1      ----- IENK I SRQVTF AKRRNGL LKKAYEL SLLCDAEVAL I IFS-
Pm LHS1      ----- IENK I SRQVTF AKRRNGL LKKAYEL SLLCDAEVAL I IFS-
WLHS1-A     ----- MGRGKVMRR I ENK I SRQVTF AKRRNGL LKKAYEL SLLCDAEVAL I IFS-
WLHS1-B     ----- MGRGKVMRR I ENK I SRQVTF AKRRNGL LKKAYEL SLLCDAEVAL I IFS-
BM7         ----- MGRGKVMRR I ENK I SRQVTF AKRRNGL LKKAYEL SLLCDAEVAL I IFS-
WLHS1-D     ----- MGRGKVMRR I ENK I SRQVTF AKRRNGL LKKAYEL SLLCDAEVAL I IFS-
Lp MADS9    ----- MGRGKVMRR I ENK I SRQVTF AKRRNGL LKKAYEL SLLCDAEVAL I IFS-
As LHS1      ----- IENK I SRQVTF AKRRNGL LKKAYEL SLLCDAEDAL I IFS-
Lh LHS1      ----- IENK I SRQVTF AKRRNGL LKKAYEL SLLCDAEVALV I IFS-
Os MADS1    ----- MGRGKVELKR I ENK I SRQVTF AKRRNGL LKKAYEL SLLCDAEVAL I IFS-
Lv LHS1      ----- LENK I SRQVTF AKRRNGL LKKAYEL SLLCDAEVAL I IFS-
Ee LHS1      ----- IENK I SRQVTF AKRRNGL LKKAYEL SLLCDAEVAL I IFS-
Os MADS5    ----- MGRGKVELKR I ENK I SRQVTF AKRRNGL LKKAYEL SVLCDAEVAL I IFS-
Lp MADS6    ----- MGRGKVELKR I ENK I SRQVTF AKRRNGL LKKAYEL SVLCDAEVAL I IFS-
ZMM3        ----- K I SRQVTF AKRRNGL LKKAYEL SVLCDAEVAL I IFS-
WSEP-A      ----- MGRGRVELKR I ENK I NRQVTF AKRRNGL LKKAYEL SVLCDAEVAL I VFS-
WSEP-B      ----- MGRGRVELKR I ENK I NRQVTF AKRRNGL LKKAYEL SVLCDAEVAL I VFS-
BM9         ----- MGRGRVELKR I ENK I NRQVTF AKRRNGL LKKAYEL SVLCDAEVAL I VFS-
WSEP-D      ----- MGRGRVELKR I ENK I NRQVTF AKRRNGL LKKAYEL SVLCDAEVAL I VFS-
Os MADS45   ----- MGRGRVELKR I ENK I NRQVTF AKRRNGL LKKAYEL SVLCDAEVAL I IFS-
ZMM6        ----- MGRGRVELKR I ENK I NRQVTF AKRRNGL LKKAYEL SVLCDAEVAL I IFS-
Os MADS24   ----- MGRGRVELKR I ENK I NRQVTF AKRRNGL LKKAYEL SVLCDAEVAL I IFS-
Ta MADS1     ----- MGRGRVELKR I ENK I NRQVTF AKRRNGL LKKAYEL SVLCDAEVAL I IFS-

```

Supplemental Figure 1. Alignment of deduced amino acid sequences of class E MADS-box genes of wheat and other monocot species.

|           |                                                                   |
|-----------|-------------------------------------------------------------------|
| Al LHS1   | GRGRLEFESSSSSCMYKTLERYRSCNYP--QEAKAPQESE I ---NYQEYLKLRTRVEFLQ    |
| Ec LHS1   | GRGRLEFESSSSSCMYKTLERYRTCNFNS--HEVKAPLDSK I ---NYQDYLLKLRTRVEFLQ  |
| Ds LHS1   | GRGRLEFESSSSSCMYKTLERYRTCNFNS--QEAKAPLDSE I ---NYQEYLKLRTRVEFLQ   |
| Cl LHS1   | GRGRLEFESSSSSCMYKTLERYRSSNYNS--QEVKAPLDSE I ---NYQEYLKLRTRVEFLQ   |
| ZMM14     | GRGRLEFESSSSSCMYKTLERYRSSNYS--QEVKTPLDTE I ---KYQDYLLKLRTRVEFLQ   |
| ZMM8      | GRGRLEFESSSSSCMYKTLERYRSSNYST--QEVKAPLESE I ---NYQDYLLKLRTRVDFLQ  |
| Sb LHS1   | GRGRLEFESSSSSCMYKTLERYRSSNYSS--QEVKVPDSE I ---NYQDYLLKLRTRVEFLQ   |
| Si LHS1   | GRGRLEFESSSSSCMYKTLERYRSSNYGS--QEIKTPLDGE I ---NYQDYLLKLRTRVEFLQ  |
| Pg LHS1   | GRGRLEFESSSSSCMYKTLERYRSSNYGS--QEVKTPSDGE I ---NYQDYLELKRTRVEFLQ  |
| Pm LHS1   | GRGRLEFESSSSSCMYKTLERYRSSNYSS--QEVKTPDGE I ---NYQDYLLKLRTRVEFLQ   |
| WLHS1-A   | GRGRLEFESSSSSCMYKTLERYRTCNSNS--QEAAPPLE-----                      |
| WLHS1-B   | GRGRLEFESSSSSCMYKTLERYRTCNSNS--QEATPPELESE I ---NYQEYLKLRTRVEFLQ  |
| BM7       | GRGRLEFESSSSSCMYKTLERYRTCNSNS--QEATPQVENE I ---NYQEYLKLRTRVEFLQ   |
| WLHS1-D   | GRGRLEFESSSSSCMYKTLERYRTCNSNS--QEATPPELENE I ---NYQEYLKLRTRVEFLQ  |
| Lp MADS9  | SRGRLEFESSSSSC IYKTLERYRTCNHNS--QEANPPELENE I ---SYQEYLKLRTRVEFLE |
| As LHS1   | GRGRLEFESSSSSCMYKTLERYRTCNYNS--QEAAPLVENE I ---NYREYLKLRTRVEFLQ   |
| Lh LHS1   | GRGRLEFESSSSSCVHKTLELYRSCNYNT--QEANAPVENE I ---NYHEYLKLRTRVDFLQ   |
| Os MADS1  | GRGRLEFESSSSSCMYKTLERYRSCNYNS--QDAAAPEN-E I ---NYQEYLKLRTRVEFLQ   |
| Lv LHS1   | GRSRLFEFSSSSSCMYKTLERYRSCNYNS--QDAAAPEN-E I ---NYQEYLKLRTRVEFLQ   |
| Ee LHS1   | GRGRLEFESSSSSCMYKTLERYRSCNYNS--Q-EAAPEN-E I ---NYQEYLKLRTRVEFLR   |
| Os MADS5  | TRGRLEFESTSSSCMYKTLERYRSCNYNLNSCEASAALETELS--NYQEYLKLRTRVEFLQ     |
| Lp MADS6  | TRGRLEFESTSSSCMYKTLERYRSCNYNS--KATATPETELS--NYQEYLKMKTRVEFLQ      |
| ZMM3      | SRGRLEFESTSSSC IYKTLERYRSCSFAS--EASAPLEAELN--NYQEYLKLRTRVEFLQ     |
| WSEP-A    | NRGKLYEFCSTQSMTKTLDKYQKCSYAG--PETTVQNRENEQLKNSRNEYLLKLRVDNLQ      |
| WSEP-B    | NRGKLYEFCSTQSMTKTLDKYQKCSYAG--PETTVQNRENEQLKNSRNEYLLKLRVDNLQ      |
| BM9       | NRGKLYEFCSTQSMTKTLDKYQKCSYAG--PETTVQNRENEQLKNSRNEYLLKLRVDNLQ      |
| WSEP-D    | NRGKLYEFCSTQSMTKTLDKYQKCSYAG--PETTVQNRENEQLKNSRNEYLLKLRVDNLQ      |
| Os MADS45 | NRGKLYEFCSTQSMTKLEKYQKCSYAG--PETAVQNREREQLKASRNEYLLKLRVENLQ       |
| ZMM6      | NRGKLYEFSSSTQSMPKTLKLYQKCSFAG--PETALQNRENEQLKSSRNEYLLKLRVDNLQ     |
| Os MADS24 | NRGKLYEFCGQSMPKTLERYQKFSYGG--PDTA IQNKENELVQSSRNEYLLKLRVENLQ      |
| Ta MADS1  | NRGKLYEFCGQSMPKTLERYQKCSYGG--PDTA IQNKENELVQSSRNEYLLKLRVENLQ      |

Supplemental Figure 1. (continued)

|           |                                                                        |
|-----------|------------------------------------------------------------------------|
| AI LHS1   | TTQRN I LGEDLGPLSMKELVQLENQ I E I SLKQ I RSRKNQMLLDQHYDLKNEQKQLQDLNK   |
| Ec LHS1   | TTQRN I LGEDLGPLSNKELEQLEKQ I E I SLTQ I RSRKNQMLLVQLLDLKSKEQELQDLNK   |
| Ds LHS1   | TTQRN I LGEDLGPLSSKELEQLENQ I E I SLKH I RTRKNQALLDQLFDLKSKEQELQDLNK   |
| CI LHS1   | TTQRN I LGEDLGPLSMKELEQLENQ I E I SLKH I RTRKSQVLLDQLFDLKTKEQELED I SK |
| ZMM14     | TTQRN I LGEDLGPLSMKELEQLEDQ I E I SLKH I SSRKNQMLLDQLFDLKSKEQELLDLNLK  |
| ZMM8      | TTQRN I LGEDLGPLSMKELEQLENQ I EVSLKH I RSRKNQMLLDQLFDLKSKEQELQDLNK     |
| Sb LHS1   | TTQRN I LGEDLGPLSMKELEQLENQ I E TSLKQ I RSRKNQMLLDQLFDLKSKEQELQDLNK    |
| Si LHS1   | TTQRN I LGEDLGPLSMKELEQLENQ I E I FLKH I RTRKNQMLLDQLFDLKSKEQELQDLNK   |
| Pg LHS1   | TTQRN I LGEDLGPLSMKELEQVENVQ I E I SLKH I KDKNQMLLNQLFDLKSKEQELQDLNK   |
| Pm LHS1   | TTQRN I LGEDLGPLSMKELEQLENQVE I SLKH I RTRKNQMLLDHLFDLKSKEQELQDLNK     |
| WLHS1-A   | -----NEEQELQDENK                                                       |
| WLHS1-B   | SSQRN I LGEDLGPLSMKELDQ I ENQ I DASLKH I RSKRNQVLLDQLFELKSKEQELQDENN   |
| BM7       | SSQRN I LGEDLGPLSMKELDQ I ENQ I DASLQH I RSKKNQVLLDQLFELKSKEQELQDENK   |
| WLHS1-D   | SSQRN I LGEDLGPLSMKELDQ I ENQ I DASLKH I RSKKNQVLLDQLFELKSKEQELQDENN   |
| Lp MADS9  | SSQRN I LGQDLGPLS I KELDQ I END I DVSLKH I RSRKSQVLVDQLSDLKNKEQELQDQNK |
| As LHS1   | SSQRN I LGEDLGPLSMKELDQ I ESQ I DVSLKH I RSRKNQVLLDQLFDLKSKEQELQDQNK   |
| Lh LHS1   | TNQRN I LGEDLGPLSMKELEQLDNQ I E TSLKQ I RSRKNQVLLDQLFDLKSKEQELQD I NK  |
| Os MADS1  | TTQRN I LGEDLGPLSMKELEQLENQ I EVSLKQ I RSRKNQALLDQLFDLKSKEQQLQDLNK     |
| Lv LHS1   | TTQRN I LGEDLGPLSMKELEQLENQ I EVSLKQ I RTRKSQALLDQLFDLKSKEQQLQDLNK     |
| Ee LHS1   | TTQRN I LGEDLGPLSMKELEQLENQ I VVSLKQ I RDKKNQALLDQLFELKSKEQELRDLNK     |
| Os MADS5  | TTQRNLLGEDLVPLSLKELEQLENQ I E I SLMN I RSKKNQQLLDQVFELKRKEQQLQDANK     |
| Lp MADS6  | TTQRNLLGEDLGPLS I KELEQLENQ I E I SLKN I RSTKSQQSLDQLFELKRKEQQLQDVNK   |
| ZMM3      | TTQRNLLGEDLGPLSVKELEQLENQ I E I SLKQ I RSKKNQQLLDQLFDLKRKEQQLQDANK     |
| WSEP-A    | RTQRNLLGEDLDSLG I KELESLEKQLDSSLKH I RTRTRQHMVDQLTELQRREQMFSEANK       |
| WSEP-B    | RTQRNLLGEDLDSLG I KELESLEKQLDSSLKH I RTRTRQHMVDQLTELQRREQMFSEANK       |
| BM9       | RTQRNLLGEDLDSLG I KELESLEKQLDSSLKH I RTRTRQHMVDQLTELQRREQMFSEANK       |
| WSEP-D    | RTQRNLLGEDLDSLG I KELESLEKQLDSSLKH I RTRTRQHMVDQLTELQRREQMFSEANK       |
| Os MADS45 | RTQRNLLGEDLDSLG I KELESLEKQLDSSLKHVTRTRTKHLVDQLTELQRKEQMVSEANR         |
| ZMM6      | RTQRNLLGEDLES LG I KELEHLEKQLDSSLKH I RSTRTRQHMVDQLTELQKKEQMFCEANK     |
| Os MADS24 | RTQRNLLGEDLGTLG I KELEQLEKQLDSSLRH I RSTRTRQHMLDQLTDLQRREQMLCEANK      |
| Ta MADS1  | RTQRNLLGEDLGSLG I KDLEQLEKQLDSSLRH I RSTRTRQHMLDQLTDLQRREQMLCEANK      |

Supplemental Figure 1. (continued)

|           |                                                                 |
|-----------|-----------------------------------------------------------------|
| Al LHS1   | DLRKK--LQETSG----ENALH- I SWEE -GGHSGASG-----NAIE-----PNQGFLQH  |
| Ec LHS1   | DLRKKKQLKKTG----ENATH- I SWEE -GGHSGTSR-----NANE-----PNQGFLQH   |
| Ds LHS1   | DLRKK--LQETSG----ENAVH- I SWEE -GGHSGASG-----NAME-----PSQGFLQH  |
| Cl LHS1   | GLRKK--LHETSG----ENALH- I SWEE -GGHSGASG-----NAVE-----PYQGFQQH  |
| ZMM14     | DLRQK--LQETRP----ENALR- VSWEE -GGHSGASG-----NVLD-----PYQGLLQH   |
| ZMM8      | DLRKK--LQETSP----QNV I HDVSWEE -GGHSGSS-----VLG-----PFQGLLQY    |
| Sb LHS1   | DLRKK--LQETSP----ENALHVSSWEE -GGHSGASG-----NVLD-----PYQGLLQH    |
| Si LHS1   | DLRKK--LQETNA----ESVLH- VSWEE -GGHSGTSG-----NAIE-----PYQGFLLQ   |
| Pg LHS1   | DLRKK--LQETNA----ESVLH-LSWEE -GGHSGTGG-----NAIE-----PYQGFLLQ    |
| Pm LHS1   | DLRKK--LQETNA----ENVLH- VSWEE -GGHSGASG-----NAIE-----PYQGFLLQ   |
| WLHS1-A   | DLRKK--LQDTS-SCGENAVHMS-WQD-GGQSSSR-----VLQH                    |
| WLHS1-B   | DLRKK--LQDTS-CCGENAVHMS-WQD-GGQCSSR-----VL-H                    |
| BM7       | DLRKK--LQDTTTS-SCGENAVHMS-WQD-GGQSSRR-----HATE-----PYPGVLQH     |
| WLHS1-D   | DLRKK--LQDTS-CCGDNVAVHMS-WQD-GGQCSSR-----VLH                    |
| Lp MADS9  | DLRKK--LQDT I L---EKNVAVHML-WQD-GGQNSGHA-----I EPY-----QG--LLQY |
| As LHS1   | DLRKK--LQEMSC---GENAVHMS-WQDGGGQSSSSG-----QAVD-----PYPGPLQH     |
| Lh LHS1   | DLRKK--LQETNG---DQKVVI NSWQD-GGQSSSSG-----HAIE-----PYQGLIQH     |
| Os MADS1  | DLRKK--LQETSA----ENVLH-MSWQDGGG-HSGSS-----TVLA-DQPHHHQGLLHP     |
| Lv LHS1   | DLRKK--LQETSA----ENVLY-MSWQDGGG-HSGSA-----TVLAADQPHHHQGLLHP     |
| Ee LHS1   | DLRKK--LQETT G---DNVLH-MSWQDGGGQHSGSS-----GLTA-----EHHQGLLHH    |
| Os MADS5  | DLRKK--IQETSG----ENMLH- I SCQDVGPSG---H-----ASEAN-----QEFLHH    |
| Lp MADS6  | DLRKK--IQETSA----ENVLH-MSQDVGPSGSSGQ-----ANQANE-----QELFHS      |
| ZMM3      | DLRKK--IEETSE----ENVLR-LSSQD I GCSGSSGH-----GDEAN-----QEHLQL    |
| WSEP-A    | CLRIK--LEESNQ-----VHGQQLWEHNNNVLSYE-----RQPEVQPPMHGNGFFHP       |
| WSEP-B    | CLRIK--LEESNQ-----VHGQQLWEHNNNVLSYE-----RQPEVQPPMHGNGFFHP       |
| BM9       | CLRIK--LEESNQ-----VHGQQLWEHNNNVLSYE-----RQPEVQPPMHGNGFFHP       |
| WSEP-D    | CLRIK--LEESNQ-----VHGQQLWEHNNNVLYE-----RQPEVQPPMHGNGFFHP        |
| Os MADS45 | CLRRK--LEESNH-----VRGQVWEQGCNLI GYE-----RQPEVQPLHGNGFFHP        |
| ZMM6      | CLRRR--LEESNQ-----VIWQHAWEQS-----E-----RHSEVQPQLNGNFFHP         |
| Os MADS24 | CLRRK--LEESNQ-----LHGQVWE-HGATLLGYE--RQSPHAVQVPPHGNGFFHS        |
| Ta MADS1  | CLRRK--LEESSQ-----MQGQWWEQAANLLGYDQLRQSPH-QQAPHHGNGFFHP         |

Supplemental Figure 1. (continued)

|           |                                                    |
|-----------|----------------------------------------------------|
| AI LHS1   | PEN-D-SSLQIGYHQQA-----YMDQLSNEDMGAHH-----          |
| Ec LHS1   | AEN-NYSSLQIGYYQQA-----YMDQLNNQDIGAAHN-----         |
| Ds LHS1   | PEN-D-SDLHMGYHQQA-----YMDHLNNEDEMAAPHH-----        |
| CI LHS1   | REN-E-SSLQIGYRQQA-----YMEQLNNEDEMED-----           |
| ZMM14     | LDN-D-PSLQFGYHHQA-----YMDQLNNEDELVDPNEHGRSGWI----- |
| ZMM8      | HGN-D-PSLQTRYHQQA-----YMDQLN-EDMADPDEHGRSGWI-----  |
| Sb LHS1   | PES-D-PSLQIGYHQQA-----YMDQLNNEDEMAG-----           |
| Si LHS1   | PDN-D-PSLQIGYHQQA-----YMDQLNNEDEMGD-----           |
| Pg LHS1   | PEN-D-PSLQIGYHQQA-----YIDQLNNEDEMD-----            |
| Pm LHS1   | PEN-D-PSLQIGYHQQA-----YMDQLNNEDEMD-----            |
| WLHS1-A   | PEH-D-TSMQIGYP-QA-----YMDQLNSRDHVASERPGG--GSSAGWI  |
| WLHS1-B   | PEH-D-TSMQIGYP-RA-----YMDQLNNRDHSVACERPGG--GSSAGWI |
| BM7       | PEH-D-TSMQIGYP-QA-----YMDQLNNRDHMASQRPGGHPGSSAGWI  |
| WLHS1-D   | PEH-D-TSMQIGYP-QA-----YMDQLNKQ-----RSRGF-          |
| Lp MADS9  | PDH-G-SSMQIGYH-QS-----YTDQLNNDKIASQNNPNEGEPGSSAGWI |
| As LHS1   | PEH-D-SSMQIGYH-QT-----YMEQLBNEDHTASHHPNAQPGSSAGWI  |
| Lh LHS1   | PEN-D-PSMQIAYH-QV-----YMDQLNHEDMAAQH-----          |
| Os MADS1  | HPDQGDHSLQIGYHHPAHHHQAYMDHLSNEAADMVAHHPNEHPSGWI-   |
| Lv LHS1   | HPE-GDHSLQIGYHHTH-HHHQAYMDHLNNEA-DMVAHH-----       |
| Ee LHS1   | QDQ-GNHSLQIGYHQAY-----MDHLNNEA-EMAGHN-----         |
| Os MADS5  | AIC--DPSLHIG-YQAY-----MDHLNQ-----                  |
| Lp MADS6  | AVC--DPTLHIGFHQSY-----LDQLNND-----                 |
| ZMM3      | AL---DPSLHIG-YQAY-----MDHLNND-----                 |
| WSEP-A    | LDAAGEPTLHIGYPPE-----SLNSSCMTT-FMPPWLP-----        |
| WSEP-B    | LDAAGEPTLHIGYPPE-----SLNSSCMTT-FMPPWLP-----        |
| BM9       | LDAAGEPTLHIGYPPE-----SLNSSCMTT-FMPPWLP-----        |
| WSEP-D    | LDAAGEPTLHIGYPPE-----SMSNSCMTT-FMPPWLP-----        |
| Os MADS45 | LDAAGEPTLQIGYPAEH-----HEAMNSACMNT-YMPPWLP-----     |
| ZMM6      | LDGAGEPTLQIGYPSE-----ALTSSCMTT-FLPPWLP-----        |
| Os MADS24 | LEAAAEPQLQIGFTPE-----QMNNSCVTA-FMPTWLP-----        |
| Ta MADS1  | LDPTTEPTLQIGYTQE-----QINNACVAASFMPWLP-----         |

Supplemental Figure 1. (continued)
