# Supplementary material
Source: PubMed Central journal article supplement (PMC1955732)
Supplement: plntcell_tpc.107.051813_2.pdf [file plntcell_tpc.107.051813_2.pdf]

Supplemental Table 1. 90 lines of diploid, tetraploid and hexaploid species and of synthetic hexaploids that were used for screening of the variant *WLHSI-A* (*WLHSI-A*<sup>novel</sup>).

| No. | accession No. | Species, Variety (Cultivar)                                       | Origin  | <i>WLHSI-A</i> <sup>novel</sup> | Ploidy     | Chr. no. | Genome const. |
|-----|---------------|-------------------------------------------------------------------|---------|---------------------------------|------------|----------|---------------|
| 1   | KU-199-1      | <i>Triticum urartu</i> Thum.var. spontanealbum Thum.              | Armenia | -                               | Diploid    | 2n=14    | AA            |
| 2   | PI428183      | <i>Triticum urartu</i> Thum.                                      | Armenia | -                               | Diploid    | 2n=14    | AA            |
| 3   | PI428227      | <i>Triticum urartu</i> Thum.                                      | Turkey  | -                               | Diploid    | 2n=14    | AA            |
| 4   | PI428245      | <i>Triticum urartu</i> Thum.                                      | Turkey  | -                               | Diploid    | 2n=14    | AA            |
| 5   | PI428249      | <i>Triticum urartu</i> Thum.                                      | Turkey  | -                               | Diploid    | 2n=14    | AA            |
| 6   | PI428253      | <i>Triticum urartu</i> Thum.                                      | Iraq    | -                               | Diploid    | 2n=14    | AA            |
| 7   | PI428254      | <i>Triticum urartu</i> Thum.                                      | Turkey  | -                               | Diploid    | 2n=14    | AA            |
| 8   | PI428259      | <i>Triticum urartu</i> Thum.                                      | Armenia | -                               | Diploid    | 2n=14    | AA            |
| 9   | PI428264      | <i>Triticum urartu</i> Thum.                                      | Lebanon | -                               | Diploid    | 2n=14    | AA            |
| 10  | PI428317      | <i>Triticum urartu</i> Thum.                                      | Iran    | -                               | Diploid    | 2n=14    | AA            |
| 11  | PI487268      | <i>Triticum urartu</i> Thum.                                      | Syria   | -                               | Diploid    | 2n=14    | AA            |
| 12  | PI487270      | <i>Triticum urartu</i> Thum.                                      | Syria   | -                               | Diploid    | 2n=14    | AA            |
| 13  | PI538743      | <i>Triticum urartu</i> Thum.                                      | Lebanon | -                               | Diploid    | 2n=14    | AA            |
| 14  | PI538748      | <i>Triticum urartu</i> Thum.                                      | Lebanon | -                               | Diploid    | 2n=14    | AA            |
| 15  | PI554598      | <i>Triticum urartu</i> Thum.                                      | Turkey  | -                               | Diploid    | 2n=14    | AA            |
| 16  | KU-108-5      | <i>Triticum dicoccoides</i> Koern. var. kotschyanum Schulz        |         | -                               | Tetraploid | 2n=28    | AABB          |
| 17  | KU-110        | <i>Triticum dicoccoides</i> Koern. var. straussianum Schulz       | Israel  | -                               | Tetraploid | 2n=28    | AABB          |
| 18  | KU-198        | <i>Triticum dicoccoides</i> Koern. var. aaronsohni Flaksb.        | Israel  | -                               | Tetraploid | 2n=28    | AABB          |
| 19  | KU-195        | <i>Triticum dicoccoides</i> Koern. var. araleicum Jakubz.         | Israel  | -                               | Tetraploid | 2n=28    | AABB          |
| 20  | KU-109        | <i>Triticum dicoccoides</i> Koern. var. spontaneonigrum Flaksb.   | Israel  | -                               | Tetraploid | 2n=28    | AABB          |
| 21  | KU-108-2      | <i>Triticum dicoccoides</i> Koern. var. kotschyanum Schulz        | Syria   | -                               | Tetraploid | 2n=28    | AABB          |
| 22  | KU-112        | <i>Triticum dicoccum</i> Schuebl. var. arrs Hochst. (Khapli)      | China   | +                               | Tetraploid | 2n=28    | AABB          |
| 23  | KU-113        | <i>Triticum dicoccum</i> Schuebl. var. farrum Koern. (Emmer)      |         | +                               | Tetraploid | 2n=28    | AABB          |
| 24  | KU-114        | <i>Triticum dicoccum</i> Schuebl. var. atratum Koern. (French 57) |         | -                               | Tetraploid | 2n=28    | AABB          |
| 25  | KU-115        | <i>Triticum dicoccum</i> Schuebl. var. atratum Koern. (Emmer)     |         | -                               | Tetraploid | 2n=28    | AABB          |
| 26  | KU-116        | <i>Triticum dicoccum</i> Schuebl. var. farrum Koern. (White)      |         | -                               | Tetraploid | 2n=28    | AABB          |
| 27  | KU-117        | <i>Triticum dicoccum</i> Schuebl. var. rufum Koern. (Russian 26)  |         | -                               | Tetraploid | 2n=28    | AABB          |
| 28  | KU-189        | <i>Triticum dicoccum</i> Schuebl. var. pycnurum Koern.            |         | +                               | Tetraploid | 2n=28    | AABB          |
| 29  | KU-111        | <i>Triticum dicoccum</i> Schuebl. var. liguliforme Koern.         |         | +                               | Tetraploid | 2n=28    | AABB          |
| 30  | KU-118        | <i>Triticum dicoccum</i> Schuebl. var. atratum Koern. (French 64) |         | -                               | Tetraploid | 2n=28    | AABB          |
| 31  | KU-119        | <i>Triticum dicoccum</i> Schuebl. var. albiramosum Koern.         |         | +                               | Tetraploid | 2n=28    | AABB          |
| 32  | KU-120        | <i>Triticum dicoccum</i> Schuebl. var. fuchsii Koern. (WR 7)      |         | +                               | Tetraploid | 2n=28    | AABB          |
| 33  | KU-122        | <i>Triticum dicoccum</i> Schuebl. var. atratum Koern.             |         | +                               | Tetraploid | 2n=28    | AABB          |
| 34  | KU-123        | <i>Triticum dicoccum</i> Schuebl. var. farrum Koern.              |         | -                               | Tetraploid | 2n=28    | AABB          |
| 35  | KU-124        | <i>Triticum dicoccum</i> Schuebl. var. rufum Koern. (Vernal)      |         | -                               | Tetraploid | 2n=28    | AABB          |
| 36  | KU-125        | <i>Triticum durum</i> Desf. var. reichenbachii Koern.             |         | -                               | Tetraploid | 2n=28    | AABB          |
| 37  | KU-126        | <i>Triticum durum</i> Desf. var. coeruleascens Koern.             |         | -                               | Tetraploid | 2n=28    | AABB          |
| 38  | KU-127        | <i>Triticum durum</i> Desf. var. hordeiforme Koern.               |         | -                               | Tetraploid | 2n=28    | AABB          |
| 39  | KU-128-1      | <i>Triticum durum</i> Desf. var. melanopus Koern.                 | China   | -                               | Tetraploid | 2n=28    | AABB          |
| 40  | KU-129-1      | <i>Triticum durum</i> Desf. var. africanum Koern.                 | China   | -                               | Tetraploid | 2n=28    | AABB          |
| 41  | MP21          | <i>Triticum durum</i> Desf. var. africanum Koern. (Langdon)       |         | -                               | Tetraploid | 2n=28    | AABB          |

|    |                     |                                                                                              |             |   |                     |       |        |
|----|---------------------|----------------------------------------------------------------------------------------------|-------------|---|---------------------|-------|--------|
| 42 | KT10-1              | <i>Triticum turgidum</i> L. var. nigro-barbatum                                              |             | - | Tetraploid          | 2n=28 | AABB   |
| 43 | KU-138              | <i>Triticum carthlicum</i> Nevski var. stramineum Zhunk.                                     |             | - | Tetraploid          | 2n=28 | AABB   |
| 44 | KU-141              | <i>Triticum polonicum</i> L. var. vestitum Koern.                                            |             | - | Tetraploid          | 2n=28 | AABB   |
| 45 | KU-107-1            | <i>Triticum timopheevi</i> Zhuk. var. typicum Zhuk.                                          |             | - | Tetraploid          | 2n=28 | AABB   |
| 46 | KU-161              | <i>Triticum sphaerococcum</i> Perc. var. retundatum Perc.                                    |             | - | Hexaploid           | 2n=42 | AABBDD |
| 47 | KT019-001           | <i>Triticum spelta</i> L. var. duhamelianum                                                  |             | - | Hexaploid           | 2n=42 | AABBDD |
| 48 | KU-154              | <i>Triticum macha</i> Dek. et Men. var. sub-letschumicum Dek. et Men.                        |             | + | Hexaploid           | 2n=42 | AABBDD |
| 49 | KU-155              | <i>Triticum macha</i> Dek. et Men. var. paleo-imereticum Dek. et Men.                        |             | + | Hexaploid           | 2n=42 | AABBDD |
| 50 | KU-193 6B-454       | <i>Triticum macha</i> Dek. et Men. var. sub-letschumicum Dek. et Men.                        |             | + | Hexaploid           | 2n=42 | AABBDD |
| 51 | KU-194 6B-455       | <i>Triticum macha</i> Dek. et Men. var. paleo-imereticum Dek. et Men.                        |             | + | Hexaploid           | 2n=42 | AABBDD |
| 52 | KU-197 1959-7-4-10k | <i>Triticum macha</i> Dek. et Men. var. sub-megrelicum Dek. et Men.                          | Trukey      | + | Hexaploid           | 2n=42 | AABBDD |
| 53 | KT021-002           | <i>Triticum compactum</i> Host cv. Red Egyptian                                              | Turkey      | - | Hexaploid           | 2n=42 | AABBDD |
| 54 | KU-167              | <i>Triticum aestivum</i> L. var. alborubrum Koern.                                           | China       | - | Hexaploid           | 2n=42 | AABBDD |
| 55 | KU-251-1            | <i>Triticum aestivum</i> L. var. ferrugineum Alef.                                           | China       | - | Hexaploid           | 2n=42 | AABBDD |
| 56 | KU-431              | <i>Triticum aestivum</i> L. var. leucospermum Koern. (Yalta)                                 | Pakistan    | - | Hexaploid           | 2n=42 | AABBDD |
| 57 | KU-451              | <i>Triticum aestivum</i> L. var. turcicum Koern.                                             | Afghanistan | - | Hexaploid           | 2n=42 | AABBDD |
| 58 | KU-479              | <i>Triticum aestivum</i> L. var. graecum Koern.                                              | China       | + | Hexaploid           | 2n=42 | AABBDD |
| 59 | KU-481              | <i>Triticum aestivum</i> L. var. graecum Koern.                                              | China       | - | Hexaploid           | 2n=42 | AABBDD |
| 60 | KU-507              | <i>Triticum aestivum</i> L.                                                                  | China       | + | Hexaploid           | 2n=42 | AABBDD |
| 61 | KU-1015             | <i>Triticum aestivum</i> L.                                                                  | Spain       | - | Hexaploid           | 2n=42 | AABBDD |
| 62 | KU-1330             | <i>Triticum aestivum</i> L.                                                                  | Greece      | - | Hexaploid           | 2n=42 | AABBDD |
| 63 | KU-1400             | <i>Triticum aestivum</i> L.                                                                  | Romania     | - | Hexaploid           | 2n=42 | AABBDD |
| 64 | KU-3003             | <i>Triticum aestivum</i> L. var. barbarossa Alef.                                            | Pakistan    | - | Hexaploid           | 2n=42 | AABBDD |
| 65 | KU-3062             | <i>Triticum aestivum</i> L. var. subturcicum Vav.                                            | Afghanistan | - | Hexaploid           | 2n=42 | AABBDD |
| 66 | KU-3100             | <i>Triticum aestivum</i> L. var. subferrugineum-inflatum Palm.                               | Iran        | + | Hexaploid           | 2n=42 | AABBDD |
| 67 | KU-3505             | <i>Triticum aestivum</i> L. var. graecum Koern.                                              | Ethiopia    | - | Hexaploid           | 2n=42 | AABBDD |
| 68 | KU-3760             | <i>Triticum aestivum</i> L. var. erythroleucon Koern.                                        | Egypt       | - | Hexaploid           | 2n=42 | AABBDD |
| 69 | U-1339              | <i>Triticum aestivum</i> L. cv. U-1339                                                       | Nepal       | - | Hexaploid           | 2n=42 | AABBDD |
| 70 | CNT-1               | <i>Triticum aestivum</i> L. cv. CNT-1                                                        | Paraguay    | - | Hexaploid           | 2n=42 | AABBDD |
| 71 | NOVOSADSKA          | <i>Triticum aestivum</i> L. cv. NOVOSADSKA CREVENA                                           | Yugoslavia  | - | Hexaploid           | 2n=42 | AABBDD |
| 72 | 1051 01WG13C        | <i>Triticum aestivum</i> L. cv. 01WG13C                                                      | China       | - | Hexaploid           | 2n=42 | AABBDD |
| 73 | 1052 Liaochun10     | <i>Triticum aestivum</i> L. cv. Liaochun10                                                   | China       | - | Hexaploid           | 2n=42 | AABBDD |
| 74 | 1053 Chuarmai28     | <i>Triticum aestivum</i> L. cv. Chuarmai28                                                   | China       | - | Hexaploid           | 2n=42 | AABBDD |
| 75 | 1054 Chuanyu12      | <i>Triticum aestivum</i> L. cv. Chuanyu12                                                    | China       | - | Hexaploid           | 2n=42 | AABBDD |
| 76 | 1055 Xiaoyan6       | <i>Triticum aestivum</i> L. cv. Xiaoyan6                                                     | China       | - | Hexaploid           | 2n=42 | AABBDD |
| 77 | 1056 Gaoyou504      | <i>Triticum aestivum</i> L. cv. Gaoyou504                                                    | China       | - | Hexaploid           | 2n=42 | AABBDD |
| 78 | VH12                | <i>Triticum aestivum</i> L. cv. Nanbukomugi                                                  | Japan       | - | Hexaploid           | 2n=42 | AABBDD |
| 79 | VH14                | <i>Triticum aestivum</i> L. cv. Saitama 27                                                   | Japan       | - | Hexaploid           | 2n=42 | AABBDD |
| 80 | VH13                | <i>Triticum aestivum</i> L. cv. Nishikazekomugi                                              | Japan       | - | Hexaploid           | 2n=42 | AABBDD |
| 81 | Sch                 | <i>Triticum aestivum</i> L. cv. Shinchunaga                                                  | Japan       | - | Hexaploid           | 2n=42 | AABBDD |
| 82 | P06                 | <i>Triticum aestivum</i> L. cv. Chinese Spring                                               | China       | + | Hexaploid           | 2n=42 | AABBDD |
| 83 | KU-221- 1a          | <i>T. dicoccoides</i> var. spontaneonigrum KU 109 x <i>Ae. squarrosa</i> var. typica KU 20-2 |             | - | Synthetic Hexaploid | 2n=42 | AABBDD |
| 84 | KU-221- 2           | <i>T. durum</i> var. coeruleascens KU 126 x <i>Ae. squarrosa</i> var. typica KU 20-1 x 20-2  |             | - | Synthetic Hexaploid | 2n=42 | AABBDD |

|    |           |                                                                                                   |  |   |                     |       |        |
|----|-----------|---------------------------------------------------------------------------------------------------|--|---|---------------------|-------|--------|
| 85 | KU-221- 3 | <i>T. turgidum</i> var. nigrobarbatum KU 147 x <i>Ae. squarrosa</i> var. typica KU 20-2           |  | - | Synthetic Hexaploid | 2n=42 | AABBDD |
| 86 | KU-221-12 | <i>T. dicoccoides</i> var. spontaneonigrum KU 109 x <i>Ae. squarrosa</i> ssp. strangulata KU 2074 |  | - | Synthetic Hexaploid | 2n=42 | AABBDD |
| 87 | KU-221-13 | <i>T. dicoccum</i> cv. Vernal KU 124 x <i>Ae. squarrosa</i> ssp. strangulata KU 2074              |  | - | Synthetic Hexaploid | 2n=42 | AABBDD |
| 88 | KU-221-24 | <i>T. turgidum</i> var. nigrobarbatum KU 147 x <i>Ae. squarrosa</i> ssp. strangulata KU 2075      |  | - | Synthetic Hexaploid | 2n=42 | AABBDD |
| 89 | KU-221-25 | <i>T. durum</i> var. coerulescens KU 126 x <i>Ae. squarrosa</i> ssp. strangulata KU 2075          |  | - | Synthetic Hexaploid | 2n=42 | AABBDD |
| 90 | KU-222    | <i>T. dicoccum</i> cv. Vernal x <i>Ae. squarrosa</i>                                              |  | - | Synthetic Hexaploid | 2n=42 | AABBDD |
